# Supplementary material
Source: MDPI journal article supplement (https://www.mdpi.com/2813-0227/3/4/26)
Supplement: s1 [file s1]

**Table S2.** Epidemiological studies of tick infestation in birds in Europe.

| Country            | Tick Prevalence (%) | Area                     | Year    | Capture Period (months) | Birds Captured (No.) | Bird Species (No.) | Birds Infested (No.) | Collected Ticks (No.) | Tick Species % all ticks                                       | Tick Loads Ticks/infest. bird | Most Infested Bird Species                                                    | Reference                    |
|--------------------|---------------------|--------------------------|---------|-------------------------|----------------------|--------------------|----------------------|-----------------------|----------------------------------------------------------------|-------------------------------|-------------------------------------------------------------------------------|------------------------------|
| Poland             | 4.4                 | 1 ornithological station | 2021    | 2 (autumn)              | 3,903                | 55                 | 173                  | 335                   | <i>I. ricinus</i> (80%)                                        | 1.9 (335/173)                 | <i>Turdus philomelos</i><br><i>Turdus merula</i><br><i>Erithacus rubecula</i> | Zajac et al., 2022 [41]      |
| Finland            | N/A                 | 11 bird ringing          | 2018    | 8 (spring-autumn)       | 193                  | 32                 |                      | 430                   | <i>I. ricinus</i> (98%)                                        | 1.0 to 7.3 (bird species)     | <i>Turdidae</i><br><i>Erithacus rubecula</i>                                  | Sormunen et al., 2022 [58]   |
| Italy              | N/A                 | 3 Islas                  | 2017-19 | 36 (spring seasons)     | 48,500               |                    |                      | 2,344                 | <i>Hyalomma</i>                                                |                               |                                                                               | Toma et al., 2021 [59]       |
| Greece             | 1.7                 | 4 localities (North)     | 2013    | 4 (summer, autumn)      | 403                  | 52                 | 7                    | 15                    | <i>I. frontalis</i><br><i>I. acuminatus</i>                    | 1-5                           | <i>Turdus merula</i><br><i>Erithacus rubecula</i>                             | Diakou et al., 2016 [39]     |
| Germany            | 3.0                 | 25 (6 Federal States)    | 2008-10 | 30                      | 23,949               | 48                 | 725                  | 3,195                 | <i>I. ricinus</i><br><i>I. hexagonus</i>                       | 3.8 (3,195/838)               | <i>Turdus merula</i><br><i>Turdus philomelos</i>                              | Klaus et al., 2016 [40]      |
| Portugal           | N/A                 | 19 Counties              | 2010-14 | 48                      | 435                  | 38                 |                      | 1,349                 | <i>I. frontalis</i><br><i>I. ricinus</i><br><i>Hyalomma</i>    |                               | <i>Turdus merula</i>                                                          | Norte et al., 2015 [54]      |
| Sweden             |                     | 1 bird observatory       | 2009    |                         | 5,365                | 65                 | 748                  | 1,335                 | <i>Ixodes</i> spp. (83%)                                       | 1.8 (1,335/748)               | <i>Anthus trivialis</i> ,<br><i>Luscinia luscinia</i><br><i>Turdus merula</i> | Sandelin et al., 2015 [21]   |
| Italy & Greece     |                     | 2 isles                  | 2009-10 | 6 (spring)              | 14,789               |                    | 463                  |                       | <i>H. marginatum</i>                                           |                               |                                                                               | Wallmenius et al., 2014 [60] |
| Russia             | 18.5                | Baltic region            | 2009    | (spring)                | 577                  | 38                 | 107                  | 212                   | <i>I. ricinus</i><br><i>I. frontalis</i><br><i>Hyalomma</i>    | 0.4 (212/107)                 | <i>Erithacus rubecula</i>                                                     | Movila et al., 2013 [52]     |
| Portugal           | 32.4 – 16.7         | 2 mixed forest (West)    | 2010-11 | 12                      | 953                  | 37                 |                      | 1,122                 | <i>I. ricinus</i><br><i>I. frontalis</i><br><i>H. punctata</i> |                               | <i>Turdus merula</i><br><i>Sturnus unicolor</i><br><i>Erithacus rubecula</i>  | Norte et al., 2012 [46]      |
| Scotland           |                     | 1 area                   | 2007    | 7 (summer, autumn)      | 1,229                | 22                 |                      | 165                   | <i>I. ricinus</i>                                              |                               | <i>Turdus merula</i>                                                          | James et al., 2011 [51]      |
| Czechia            | 41.1                | 1 locality (Certak)      | 2005    | 2                       | 1,084                |                    | 446                  | 2,240                 | <i>I. ricinus</i>                                              | 5.1 (2,240/562)               | <i>Turdus merula</i><br><i>Prunella modularis</i><br><i>Turdus philomelos</i> | Dubska et al., 2009 [44]     |
| Moldova            | 31.9                | 1 forest reserve         | 1995-97 |                         | 474                  | 10                 | 151                  | 539                   | <i>I. ricinus</i> (82%)                                        |                               | Blackbirds                                                                    | Movila et al., 2008 [50]     |
| Slovakia & Czechia | 36.7                | 3 and 1 woodlands        | 2001-02 |                         | 529 (345 & 184)      | 40                 | 194                  | 1,461                 | <i>I. ricinus</i>                                              |                               | <i>Turdus merula</i><br><i>Turdus philomelos</i>                              | Taragelova et a., 2008 [45]  |
| Switzerland        | 18.2 and 6.0        | 2 sites                  | 2002    | 5 (spring-autumn)       | 1,270                |                    | 180 17               | 417 33                | <i>I. ricinus</i> (91%)                                        | 2.3 (417/180)<br>1.9 (33/17)  | <i>Erithacus rubecula</i>                                                     | Poupon et al., 2006 [53]     |

|                  |      |                      |      |                   |        |     |     |       |                   |               |                                                                               |                                |
|------------------|------|----------------------|------|-------------------|--------|-----|-----|-------|-------------------|---------------|-------------------------------------------------------------------------------|--------------------------------|
| Switzerland      | N/A  | N/A                  | N/A  | N/A               | N/A    | N/A | N/A | 6,136 | <i>I. ricinus</i> | N/A           | <i>Erithacus rubecula</i><br><i>Turdus merula</i>                             | Papadopoulos et al., 2001 [49] |
| Sweden & Denmark | 2.0  | 7 bird observatories | 1991 | 7 (spring-autumn) | 22,998 | 42  | 465 | 967   | <i>I. ricinus</i> | 2.1 (967/465) |                                                                               | Olsen et al., 1995 [42]        |
| Switzerland      | 58.0 | 1 Lyme endemic area  | 1988 | 6 (spring-autumn) | 178    | 20  |     | 462   | <i>I. ricinus</i> |               | <i>Erithacus rubecula</i><br><i>Turdus philomelos</i><br><i>Turdus merula</i> | Humair et al., 1993 [43]       |

N/A = Not available (no data on birds ringing without ticks).

## References

21. Sandelin, L.L.; Tolf, C.; Larsson, S.; Wilhelmsson, P.; Salaneck, E.; Jaenson, T.G.T.; Lindgren, P.E.; Olsen, B.; Waldenström, J. *Candidatus* Neoehrlichia mikurensis in ticks from migrating birds in Sweden. *PLoS ONE* **2015**, *10*, e0133250. <https://doi.org/10.1371/journal.pone.0133250>.
39. Diakou, A.; Norte, A.C.; Lopes de Carvalho, I.; Nuncio, S.; Nováková, M.; Kautman, M.; Alivizatos, H.; Kazantzidis, S.; Sychra, O.; Literák, I. Ticks and tick-borne pathogens in wild birds in Greece. *Parasitol. Res.* **2016**, *115*, 2011–2016. <https://doi.org/10.1007/s00436-016-4943-3>.
40. Klaus, C.; Gethmann, J.; Hoffmann, B.; Ziegler, U.; Heller, M.; Beer, M. Tick infestation in birds and prevalence of pathogens in ticks collected from different places in Germany. *Parasitol. Res.* **2016**, *115*, 2729–2740. <https://doi.org/10.1007/s00436-016-5022-5>.
41. Zając, Z.; Kulisz, J.; Kunc-Kozioł, R.; Woźniak, A.; Filipiuk, M.; Rudolf, R.; Bartosik, K.; Cabezas-Cruz, A. Tick Infestation in Migratory Birds of the Vistula River Valley, Poland. *Int. J. Environ. Res. Public Health* **2022**, *19*, 13781. <https://doi.org/10.3390/ijerph192113781>.
42. Olsen, B.; Jaenson, T.G.T.; Bergstrom, S. Prevalence of *Borrelia burgdorferi* sensu lato-infected ticks on migrating birds. *Appl. Environ. Microbiol.* **1995**, *61*, 3082–3087. <https://doi.org/10.1128%2FAem.61.8.3082-3087.1995>.
43. Humair, P.F.; Turrian, N.; Aeschlimann, A.; Gern, L. *Ixodes ricinus* immatures on birds in a focus of Lyme borreliosis. *Folia Parasitol.* **1993**, *40*, 237–242.
44. Dubska, L.; Literák, I.; Kocianová, E.; Taragelová, V.; Sychra, O. Differential role of passerine birds in distribution of *Borrelia* Spirochetes, based on data from ticks collected from birds during the postbreeding migration period in central Europe. *Appl. Environ. Microbiol.* **2009**, *75*, 596–602. <https://doi.org/10.1128/AEM.01674-08>.
45. Taragelová, V.; Koči, J.; Hanincová, K.; Kurtenbach, K.; Derdáková, M.; Ogden, N.H.; Literák, I.; Kocianová, E.; Labuda, M. Blackbirds and song thrushes constitute a key reservoir of *Borrelia garinii*, the causative agent of Borreliosis in central Europe. *Appl. Environ. Microbiol.* **2008**, *74*, 1289–1293. <https://doi.org/10.1128%2FAEM.01060-07>.
46. Norte, A.C.; de Carvalho, I.L.; Ramos, J.A.; Gonçalves, M.; Gern, L.; Nuncio, M.S. Diversity and seasonal patterns of ticks parasitizing wild birds in western Portugal. *Exp. Appl. Acarol.* **2012**, *58*, 327–339. <https://doi.org/10.1007/s10493-012-9583-4>.
49. Papadopoulos, B.; Humair, P.F.; Aeschlimann, A.; Vaucher, C.; Buttiker, W. Ticks on birds in Switzerland. *Acarologia* **2001**, *42*, 3–19.
50. Movila, A.; Gatewood, A.; Toderas, I.; Duca, M.; Papero, M.; Uspenskaia, I.; Conovalov, J.; Fish, D. Prevalence of *Borrelia burgdorferi* sensu lato in *Ixodes ricinus* and *I. lividus* ticks collected from wild birds in the Republic of Moldova. *Int. J. Med. Microbiol.* **2008**, *298*, 149–153. <https://doi.org/10.1016/j.ijmm.2007.12.009>.
51. James, M.C.; Furness, R.W.; Bowman, A.S.; Forbes, K.J.; Gilbert, L. The importance of passerine birds as tick hosts and in the transmission of *Borrelia burgdorferi*, the agent of Lyme disease: A case study from Scotland. *IBIS* **2011**, *153*, 293–302. <https://doi.org/10.1111/j.1474-919X.2011.01111.x>.
52. Movila, A.; Alekseev, A.N.; Dubinina, H.V.; Toderas, I. Detection of tick-borne pathogens in ticks from migratory birds in the Baltic region of Russia. *Med. Vet. Entomol.* **2013**, *27*, 113–117. <https://doi.org/10.1111/j.1365-2915.2012.01037.x>.
53. Poupon, M.A.; Lommano, E.; Humair, P.F.; Douet, V.; Rais, O.; Schaad, M.; Jenni, L.; Gern, L. Prevalence of *Borrelia burgdorferi* sensu lato in ticks collected from migratory birds in Switzerland. *Appl. Environ. Microbiol.* **2006**, *72*, 976–979. <https://doi.org/10.1128%2FAEM.72.1.976-979.2006>.
54. Norte, A.C.; da Silva, L.P.; Tenreiro, P.J.Q.; Felgueiras, M.S.; Araújo, P.M.; Lopes, P.B.; Matos, C.; Rosa, A.; Ferreira, P.J.S.G.; Encarnação, P.; et al. Patterns of tick infestation and their *Borrelia burgdorferi* s.l. infection in wild birds in Portugal. *Ticks Tick-Borne Dis.* **2015**, *6*, 743–750. <https://doi.org/10.1016/j.ttbdis.2015.06.010>.
58. Sormunen, J.J.; Klemola, T.; Vesterinen, E. J. Ticks (Acari: Ixodidae) parasitizing migrating and local breeding birds in Finland. *Exp. Appl. Acarol.* **2022**, *86*, 145–156. <https://doi.org/10.1007/s10493-021-00679-3>.
59. Toma, L.; Mancuso, E.; d'Alessio, S.G.; Menegon, M.; Spina, F.; Pascucci, I.; Monaco, F.; Goffredo, M.; Di Luca, M. Tick species from Africa by migratory birds: a 3-year study in Italy. *Exp. Appl. Acarol.* **2021**, *83*, 147–164. <https://doi.org/10.1007/s10493-020-00573-4>.

60. Wallménius, K.; Barboutis, C.; Fransson, T.; Jaenson, T.G.; Lindgren, P.E.; Nyström, F.; Olsen, B.; Salaneck, E.; Nilsson, K. Spotted fever *Rickettsia* species in *Hyalomma* and *Ixodes* ticks infesting migratory birds in the European Mediterranean area. *Parasit. Vectors* **2014**, *7*. <https://doi.org/10.1186/1756-3305-7-318>

**Disclaimer/Publisher's Note:** The statements, opinions and data contained in all publications are solely those of the individual author(s) and contributor(s) and not of MDPI and/or the editor(s). MDPI and/or the editor(s) disclaim responsibility for any injury to people or property resulting from any ideas, methods, instructions or products referred to in the content.
