# Supplementary material
Source: MDPI journal article supplement (https://www.mdpi.com/2813-0227/3/4/26)
Supplement: s1 [file s1]

## Additional file.

**Figure S2.** Pairwise sequence alignment of the partial 16S rRNA gene for the human granulocytic anaplasmosis agent (GenBank U025211) and the 487-bp sequence obtained in this study (OR623250). Identical nucleotides are marked with an asterisk and single-nucleotide positions are indicated in grey. Bold-letter indicates nucleotide difference compared to the reference genome.

|          |                                                                              |     |
|----------|------------------------------------------------------------------------------|-----|
| U02521.1 | TCTTGGCTCAGAACGAACGCTGGCGGCAAGCTTAACACATGCAAGTCGAACGGATTATTC                 | 60  |
| OR623250 | -----                                                                        | 0   |
| U02521.1 | TTTATAGCTTGCTAT <b>A</b> AAGAATAGTTAGTGGCAGACGGGTGAGTAATGCATAGGAATCTA        | 120 |
| OR623250 | -TTATAGCTTGCTAT <b>G</b> AAGAATAATTAGTGGCAGACGGGTGAGTAATGCATAGGAATCTA        | 59  |
|          | *****                                                                        |     |
| U02521.1 | CCTAGTAGTATGGGATAGCCACTAGAAATGGTGGGTAATACTGTATAAT <b>CCCTGC</b> GGGGG        | 180 |
| OR623250 | CCTAGTAGTATGGGATAGCCACTAGAAATGGTGGGTAATACTGTATAAT <b>CCCTGA</b> GGGGG        | 119 |
|          | *****                                                                        |     |
| U02521.1 | AAAGATTTATCGCTATTAGATGAGCCTATGTTAGATTAGCTAGTTGGTAGGGTAAAGGCC                 | 240 |
| OR623250 | AAAGATTTATCGCTATTAGATGAGCCTATGTTAGATTAGCTAGTTGGTAGGGTAAAGGCC                 | 179 |
|          | *****                                                                        |     |
| U02521.1 | TACCAAGGCGATGATCTATAGCTGGTCTGAGAGGATGATCAGCCACACTGGAAGTGAAT                  | 300 |
| OR623250 | TACCAAGGCGATGATCTATAGCTGGCCTGAGAGGATGATCAGCCACACTGGAAGTGAAT                  | 239 |
|          | *****                                                                        |     |
| U02521.1 | ACGGTCCAGACTCCTACGGGAGGCAGCAGTGGGGAATATTGGACAATGGGCGCAAGCCTG                 | 360 |
| OR623250 | ACGGTCCAGACTCCTACGGGAGGCAGCAGTGGGGAATATTGGACAATGGGCGCAAGCCTG                 | 299 |
|          | *****                                                                        |     |
| U02521.1 | ATCCAGCTATGCCG <b>GT</b> GAGTGAGGAAGGCCTTAGGGTTGTAA <b>AA</b> CTTTTCAGTAGGGA | 420 |
| OR623250 | ATCCAGCTATGCCG <b>GT</b> GAGTGAGGAAGGCCTTAGGGTTGTAA <b>AA</b> CTTTTCAGTAGGGA | 359 |
|          | *****                                                                        |     |
| U02521.1 | AGATAATGACGGTACCTACAGAAGAAGTCCCGGCAAACTCCGTGCCAGCAGCCGCGGTAA                 | 480 |
| OR623250 | AGATAATGACGGTACCTACAGAAGAAGTCCCGGCAAACTCCGTGCCAGCAGCCGCGGTAA                 | 419 |
|          | *****                                                                        |     |
| U02521.1 | TACGGAGGGGGCAAGCGTTGTTTCGGAATTATTGGGCGTAAAGGGCATGTAGGCGGTTTCGG               | 540 |
| OR623250 | TACGGAGGGGGCAAGCGTTGTTTCGGAATTATTGGGCGTAAAGGGCATGTAGGCGGTTTCGG               | 479 |
|          | *****                                                                        |     |
| U02521.1 | TAAGTTAAAGGTGAAATGCCAGGGCTTAACCTGGAGCTGCTTTTAATACTGCCAGACTA                  | 600 |
| OR623250 | TAAGTTAA-----                                                                | 487 |
|          | *****                                                                        |     |
