# Supplementary material
Source: MDPI journal article supplement (https://www.mdpi.com/2813-0227/3/4/26)
Supplement: s1 [file s1]

Archive with 4 entries (4 files):
- Figure S1 Phylogenetic relationships .pdf
- Figure S2 Pairwise sequence alignment .pdf
- Table S1 - List of all the ringed birds and data collected from them.xlsx
- Table S2 - Epidemiological studies of tick infestation in birds in Europe.pdf
